# Supplementary material for: Synthesis of maleimide-functionalized carboranes and their utility in Michael addition reactions
Source: Royal Society of Chemistry journal article supplement (doi:10.1039/d1nj02499j), 2021-01-01
Supplement: d1nj02499j1.pdf [file d1nj02499j1.pdf]

## Synthesis of maleimide-functionalized carboranes and their utility in Michael addition reactions

Valentina A. Ol'shevskaya\*, Victoria M. Alpatova, Anton V. Makarenkov, Elena G. Kononova,  
Alexander F. Smol'yakov, Alexander S. Peregudov and Evgeny G. Rys

*A.N.Nesmeyanov Institute of Organoelement Compounds, Russian Academy of Sciences, 119991  
Moscow, Russian Federation*

### Table of Contents

|     |                                                                                                                                                                                       |    |
|-----|---------------------------------------------------------------------------------------------------------------------------------------------------------------------------------------|----|
| 1.  | The <sup>1</sup> H and <sup>11</sup> B NMR spectra of N-( <i>o</i> -carboran-3-yl)maleimide ( <b>6</b> )                                                                              | 3  |
| 2.  | The <sup>1</sup> H and <sup>11</sup> B NMR spectra of 3-bromo-1-(N-( <i>o</i> -carborane-3'-yl))maleimide ( <b>7</b> )                                                                | 3  |
| 3.  | The <sup>1</sup> H, <sup>11</sup> B and <sup>19</sup> F NMR spectra of [1-( <i>o</i> -carboran-3'-yl)-3-(4-chloro-2,3,5,6-tetrafluorophenyl)thio]-pyrrolidine-2,5-dione ( <b>11</b> ) | 4  |
| 4.  | The <sup>1</sup> H and <sup>11</sup> B NMR spectra of [1-( <i>o</i> -carboran-3'-yl)-3-( <i>L</i> -S-ethoxycarbonylcysteinyl)-pyrrolidine-2,5-dione ( <b>15</b> )                     | 5  |
| 5.  | The <sup>1</sup> H and <sup>11</sup> B NMR spectra of [1-( <i>o</i> -carborane-3'-yl)-3-(carboxymethylenethio)]-pyrrol-2,5-dione ( <b>20</b> )                                        | 6  |
| 6.  | The <sup>1</sup> H and <sup>11</sup> B NMR spectra of [1-( <i>o</i> -carborane-3'-yl)-3-(methoxycarbonylmethylenamino)]-pyrrol-2,5-dione ( <b>21</b> )                                | 6  |
| 7.  | The <sup>1</sup> H and <sup>11</sup> B NMR spectra of [1-( <i>o</i> -carborane-3'-yl)-3-(N-acetyl- <i>L</i> -S-cysteinyl)]-pyrrole-2,5-dione ( <b>22</b> )                            | 7  |
| 8.  | The <sup>1</sup> H and <sup>11</sup> B NMR spectra of [1-( <i>o</i> -carborane-3'-yl)-3-(4,6-dimethylpyrimidin-2-yl)thio]-pyrrole-2,5-dione ( <b>23</b> )                             | 8  |
| 9.  | The <sup>1</sup> H and <sup>11</sup> B NMR spectra of [6-( <i>o</i> -carboran-3'-yl)-5,7-dioxo-3-ethoxycarbonyl]perhydropyrrolo[3,4- <i>b</i> ]thiazine ( <b>24</b> )                 | 8  |
| 10. | The <sup>1</sup> H and <sup>11</sup> B NMR spectra of [1-( <i>o</i> -carborane-3'-yl)-3-( <i>m</i> -carborane-9'-yl)thio]-pyrrole-2,5-dione ( <b>28</b> )                             | 9  |
| 11. | The <sup>1</sup> H and <sup>11</sup> B NMR spectra of [1-( <i>o</i> -carborane-3'-yl)-3-( <i>o</i> -carborane-9'-yl)thio]-                                                            | 10 |

- pyrrole-2,5-dione (**29**)
12. The  $^1\text{H}$  and  $^{11}\text{B}$  NMR spectra of [1-(*o*-carborane-3'-yl)-3-(*o*-carborane-1'-yl)thio]-pyrrole-2,5-dione (**30**) 10
  13. The  $^1\text{H}$  and  $^{11}\text{B}$  NMR spectra of [1-(*o*-carboran-3'-yl)-3-S-glutathionyl]-pyrrolidine-2,5-dione (**32**) 11
  14. The  $^1\text{H}$ - $^1\text{H}$  COSY spectrum of [1-(*o*-carboran-3'-yl)-3-S-glutathionyl]-pyrrol-2,5-dione (**33**) 12
  15. The  $^1\text{H}$  and  $^1\text{H}\{^{11}\text{B}\}$  NMR spectra [1-(*o*-carboran-3'-yl)-3-S-glutathionyl]-pyrrol-2,5-dione (**33**) 13
  16. The  $^{11}\text{B}$  NMR and  $^{11}\text{B}\{^1\text{H}\}$  NMR spectra [1-(*o*-carboran-3'-yl)-3-S-glutathionyl]-pyrrol-2,5-dione (**33**) 14
  17. The  $^{13}\text{C}$  NMR spectrum of [1-(*o*-carboran-3'-yl)-3-S-glutathionyl]-pyrrol-2,5-dione (**33**) 15
  18. The  $^1\text{H}$ - $^{13}\text{C}$  HSQC spectrum of [1-(*o*-carboran-3'-yl)-3-S-glutathionyl]-pyrrol-2,5-dione (**33**) 16
  19. The  $^1\text{H}$ - $^{13}\text{C}$  HMBC spectrum of [1-(*o*-carboran-3'-yl)-3-S-glutathionyl]-pyrrol-2,5-dione (**33**) 17

## 1. The $^1\text{H}$ and $^{11}\text{B}$ NMR of *N*-(*o*-carboran-3-yl)maleimide (**6**)

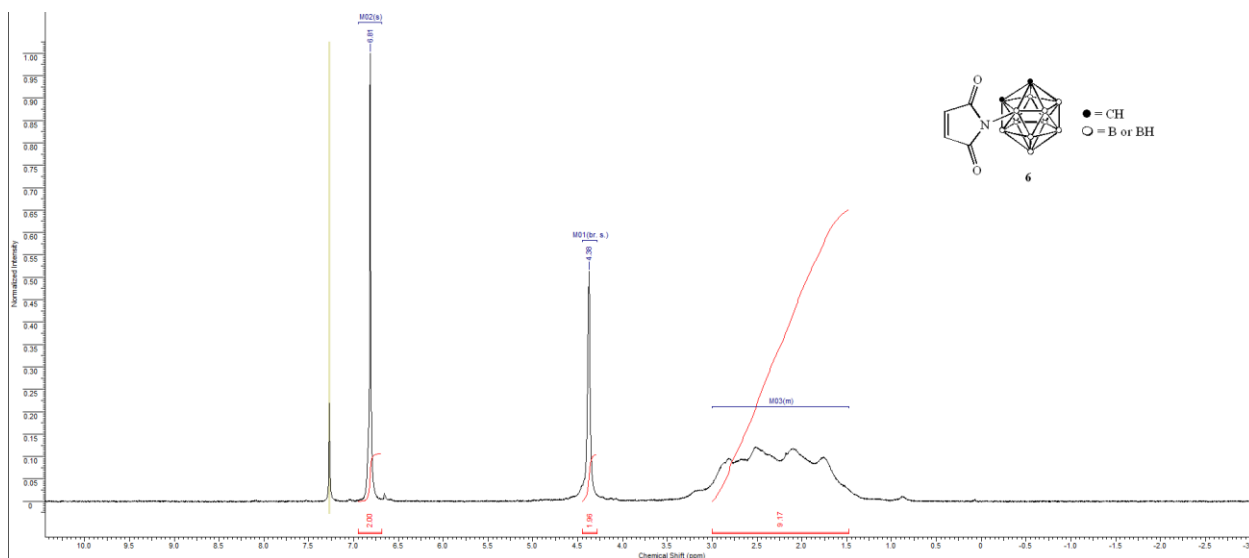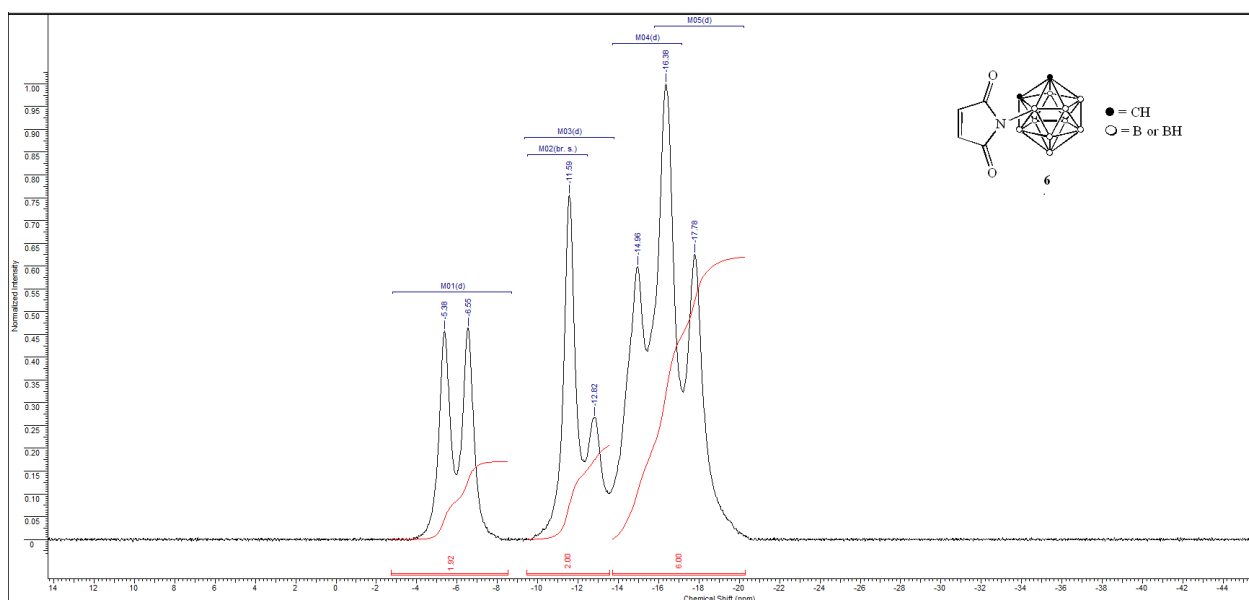

**Figure S1.** The  $^1\text{H}$ ,  $^{11}\text{B}$  NMR spectra of **6** in  $\text{CDCl}_3$  at 25 °C.

## 2. The $^1\text{H}$ and $^{11}\text{B}$ NMR spectra of 3-bromo-1-(*N*-(*o*-carborane-3'-yl))maleimide (**7**)

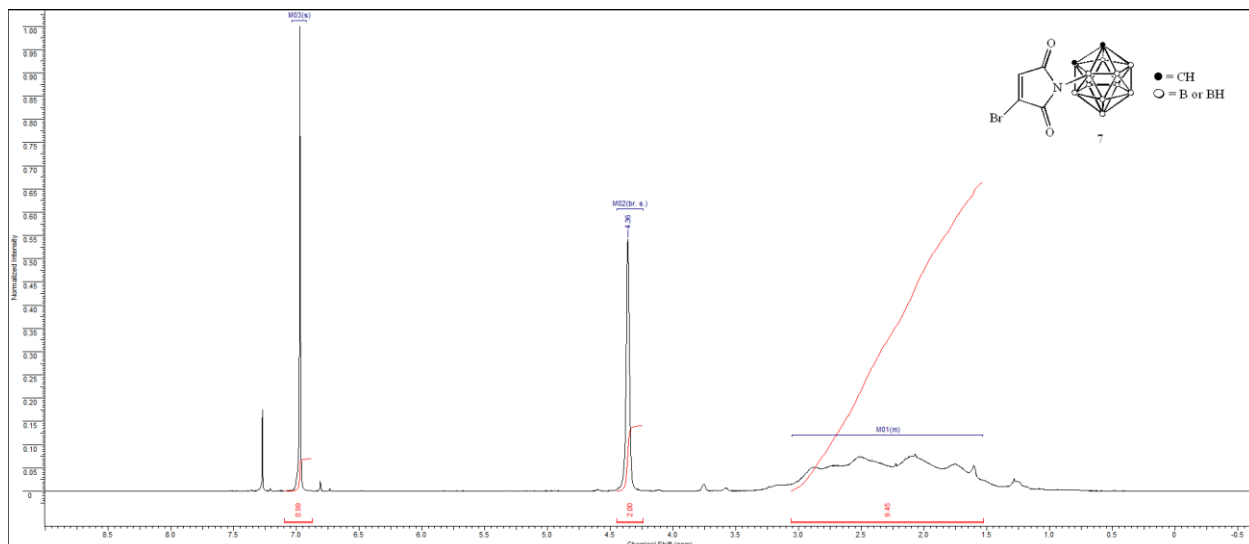

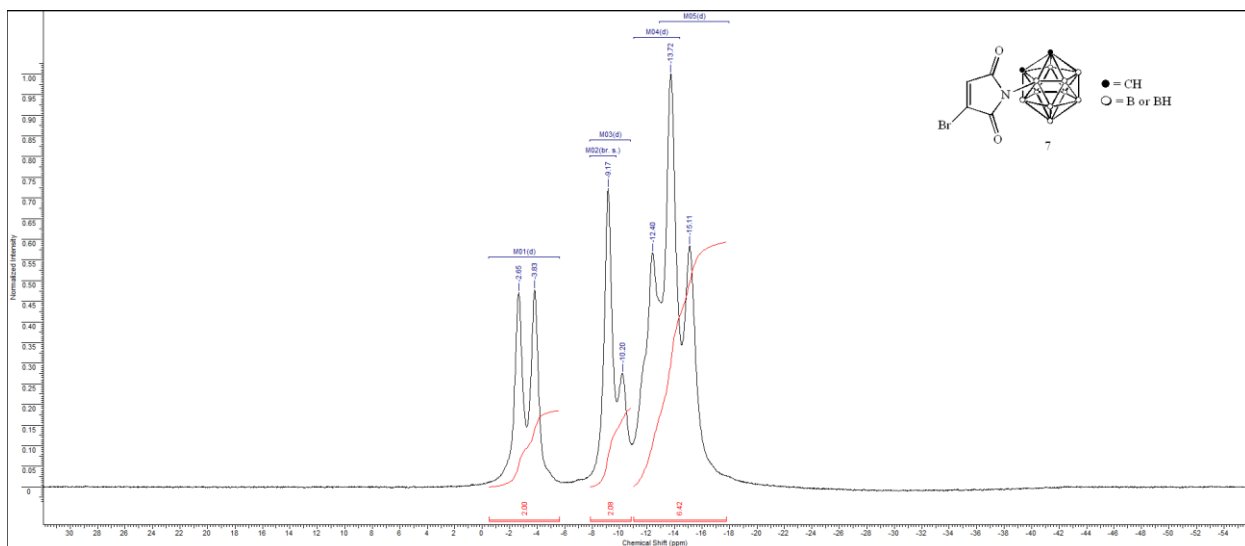

**Figure S2.** The  $^1\text{H}$ ,  $^{11}\text{B}$  NMR spectra of **7** in  $\text{CDCl}_3$  at  $25^\circ\text{C}$ .

### 3. The $^1\text{H}$ , $^{11}\text{B}$ and $^{19}\text{F}$ NMR spectra of [1-(*o*-carboran-3'-yl)-3-(4-chloro-2,3,5,6-tetrafluorophenyl)thio]-pyrrolidine-2,5-dione (**11**)

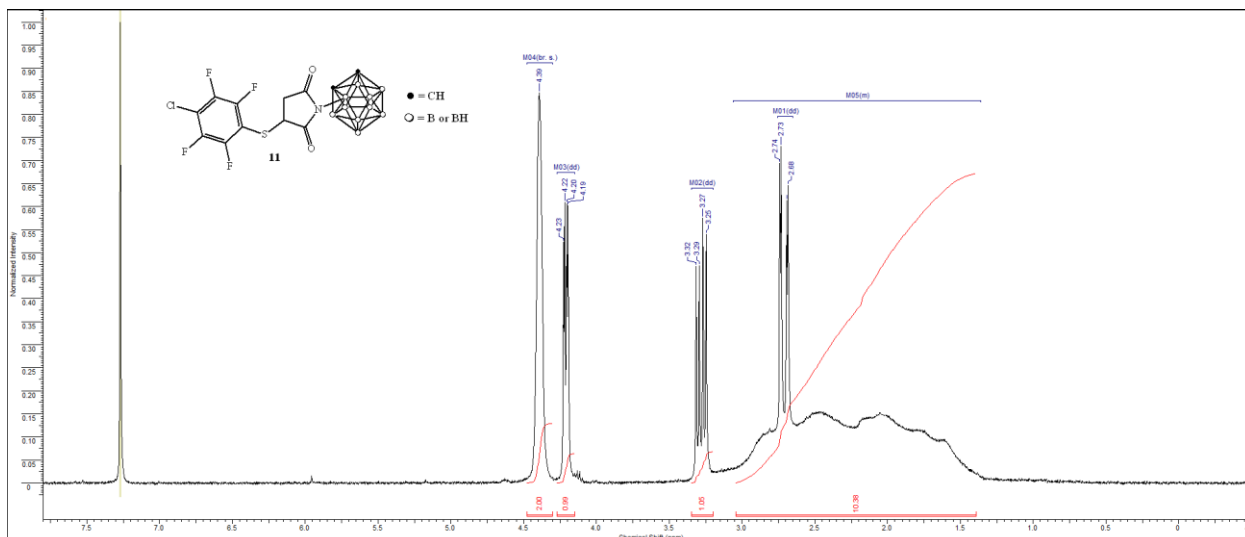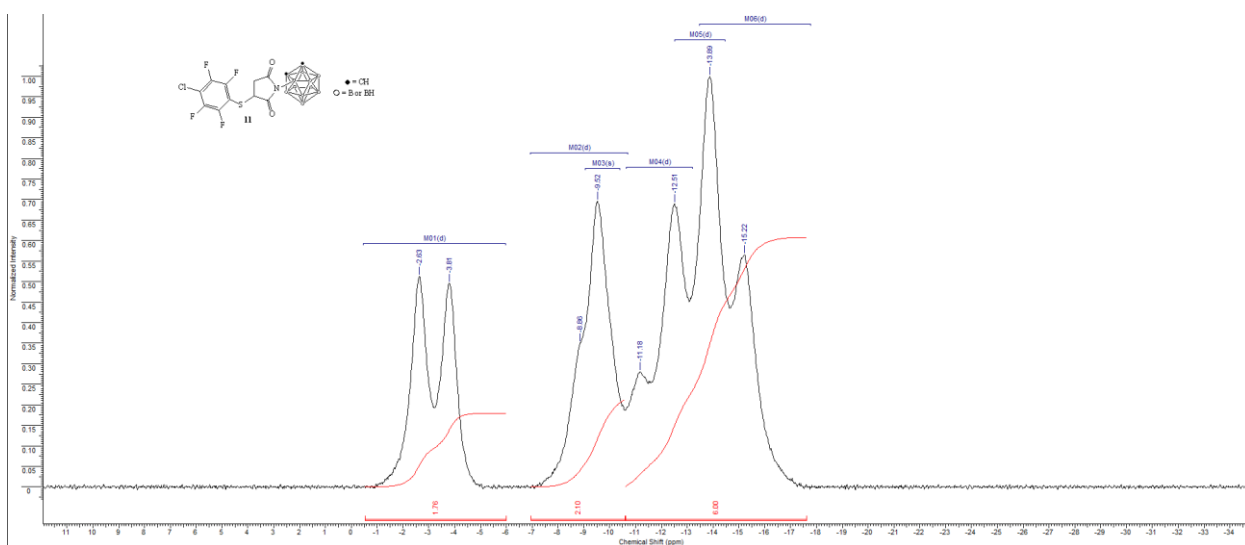

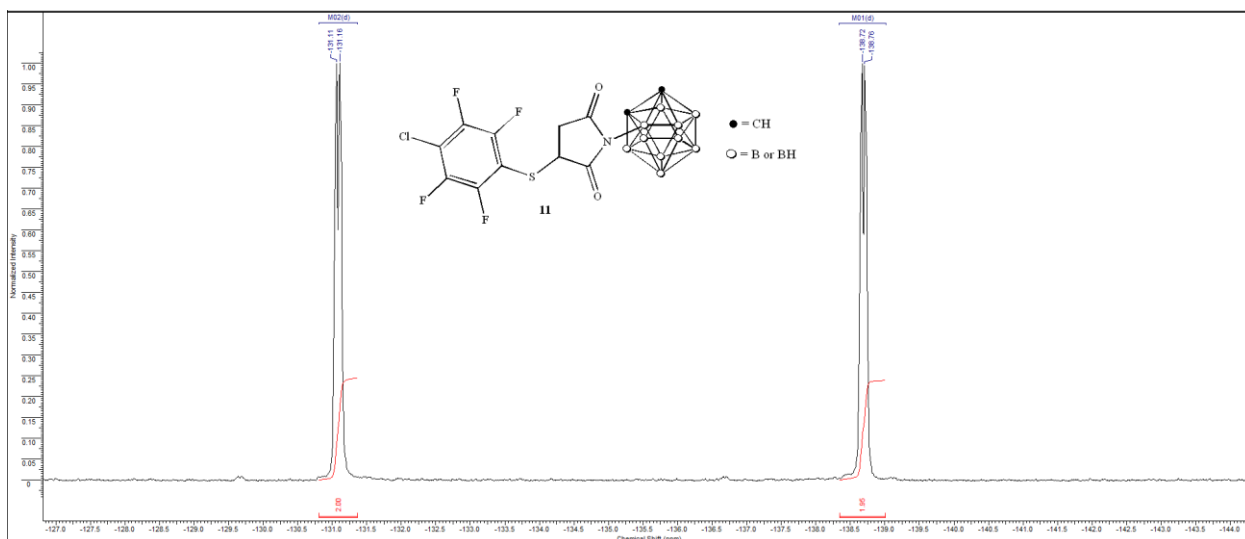

**Figure S3.** The  $^1\text{H}$ ,  $^{11}\text{B}$  and  $^{19}\text{F}$  NMR spectra of **11** in  $\text{CDCl}_3$  at  $25^\circ\text{C}$ .

#### 4. The $^1\text{H}$ and $^{11}\text{B}$ NMR spectra of [1-(*o*-carboran-3'-yl)-3-(*L*-S-ethoxycarbonylcysteinyl)-pyrrolidine-2,5-dione (**15**)]

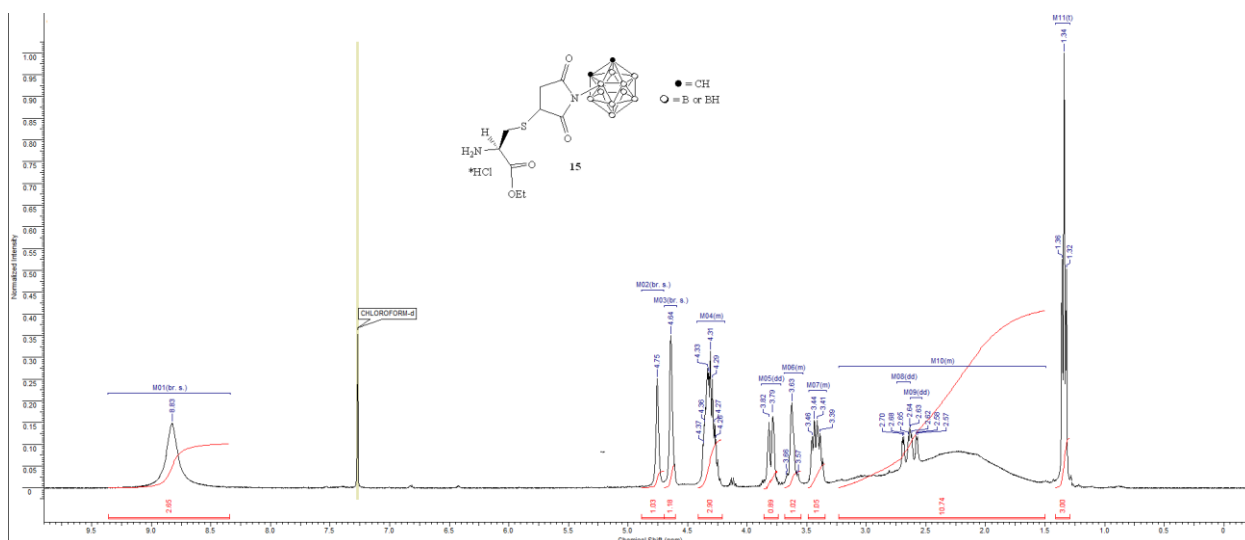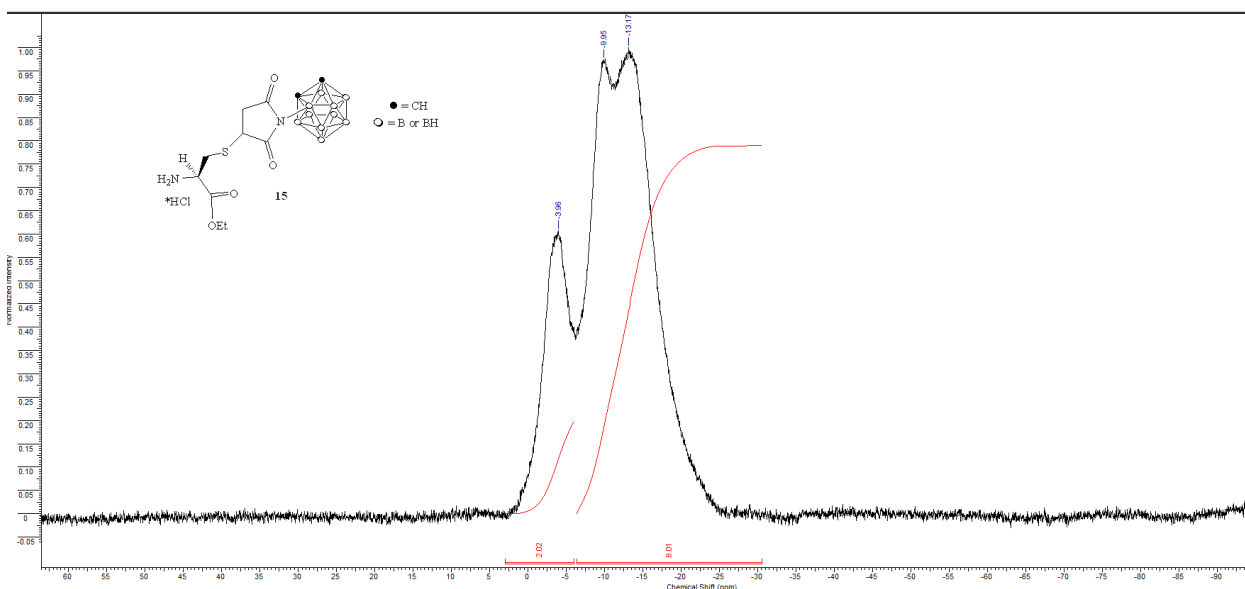

**Figure S4.** The  $^1\text{H}$ ,  $^{11}\text{B}$  NMR spectra of **15** in  $\text{CDCl}_3$  at  $25^\circ\text{C}$ .

5. The  $^1\text{H}$  and  $^{11}\text{B}$  NMR spectra of [1-(*o*-carborane-3'-yl)-3-(carboxymethenethio)]-pyrrol-2,5-dione (**20**)

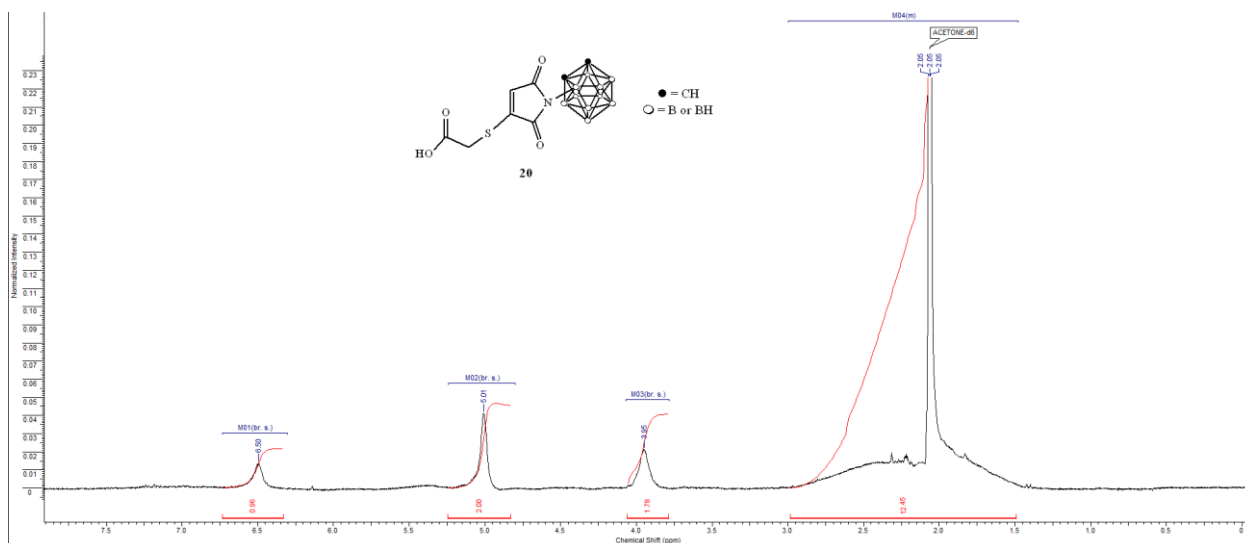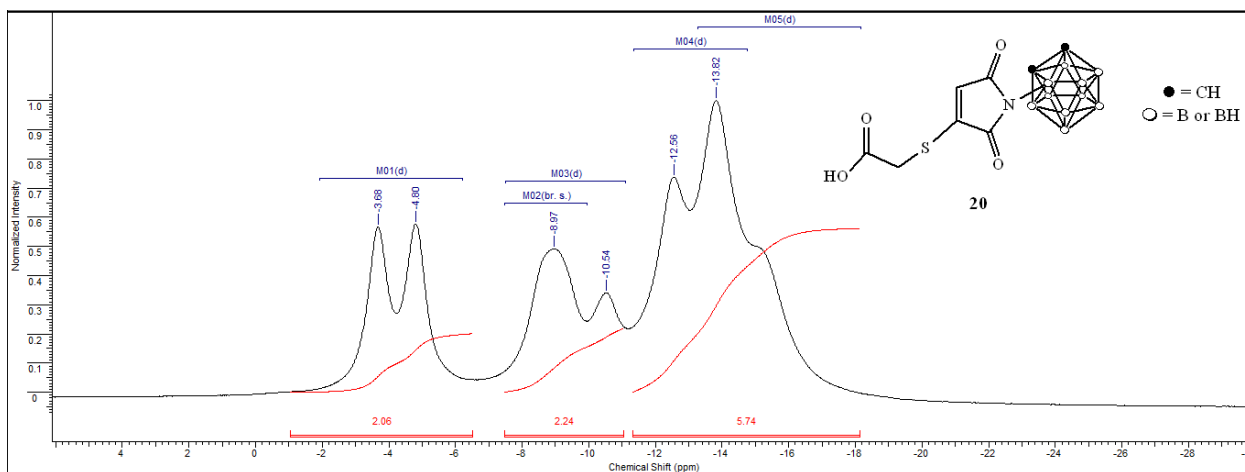

Figure S5. The  $^1\text{H}$  and  $^{11}\text{B}$  NMR spectra of **20** in  $(\text{CD}_3)_2\text{CO}$  at 25  $^\circ\text{C}$ .

6. The  $^1\text{H}$  and  $^{11}\text{B}$  NMR spectra of [1-(*o*-carborane-3'-yl)-3-(methoxycarbonylmethenamino)]-pyrrol-2,5-dione (**21**)

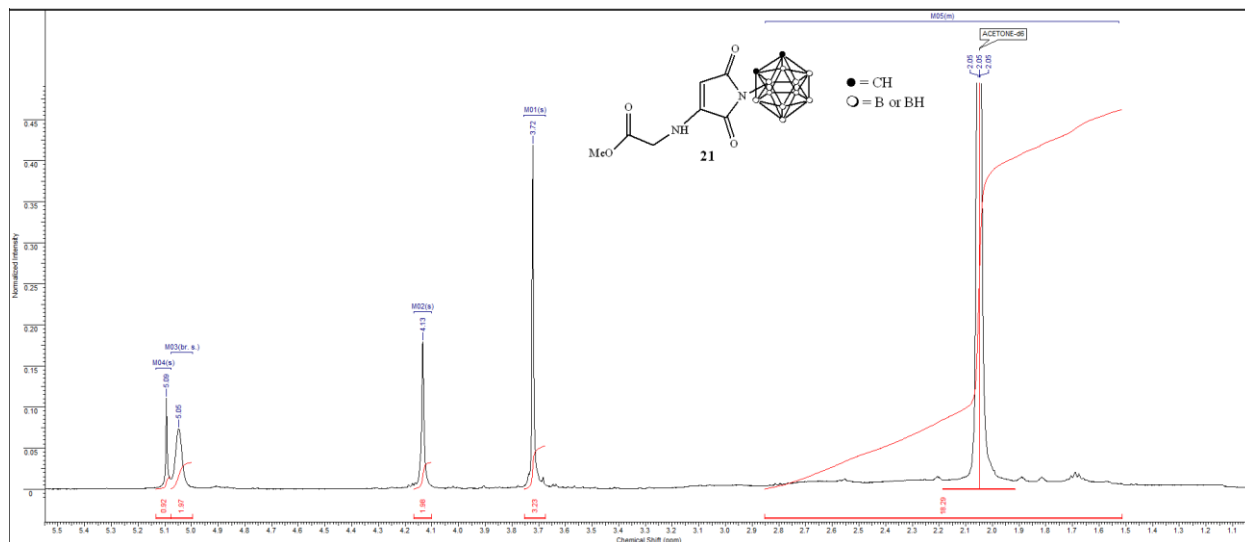

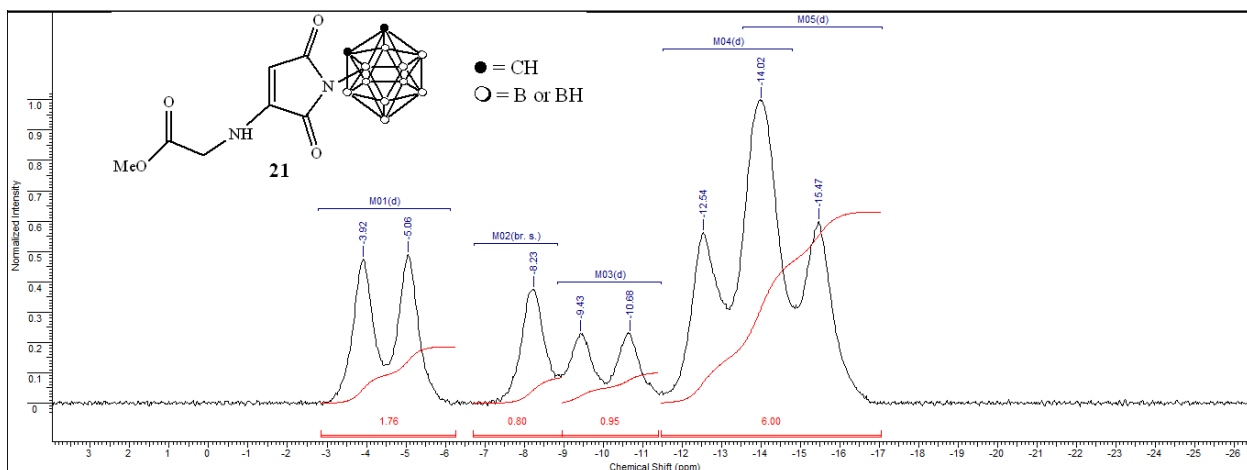

Figure S6. The  $^1\text{H}$  and  $^{11}\text{B}$  NMR spectra of **21** in  $(\text{CD}_3)_2\text{CO}$  at  $25^\circ\text{C}$ .

### 7. The $^1\text{H}$ and $^{11}\text{B}$ NMR spectra of [1-(*o*-carborane-3'-yl)-3-(*N*-acetyl-*L*-S-cysteinyl)]-pyrrole-2,5-dione (**22**)

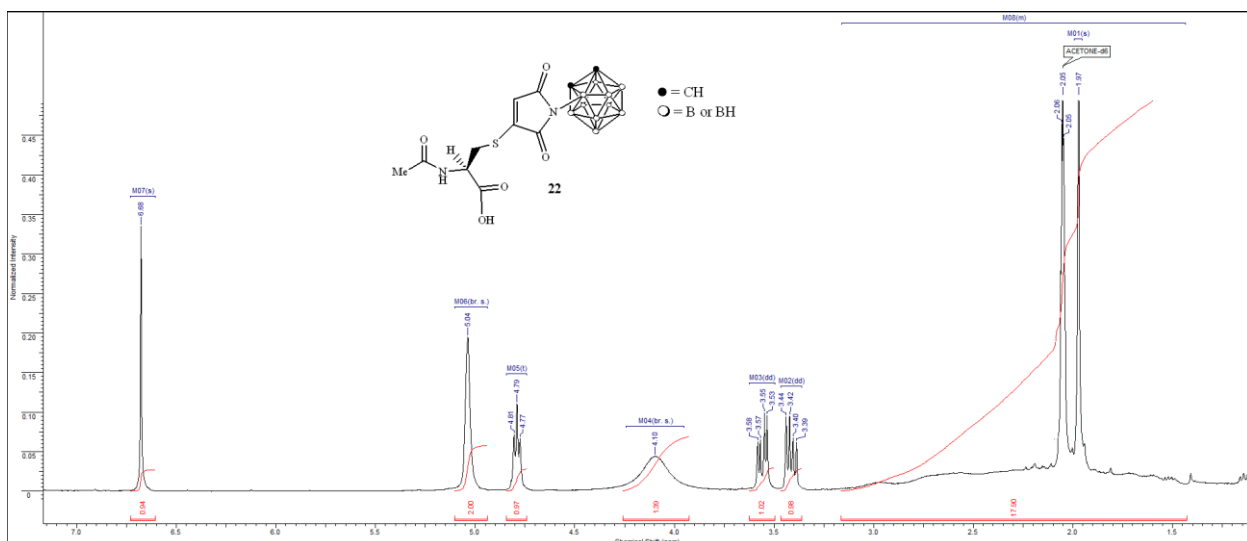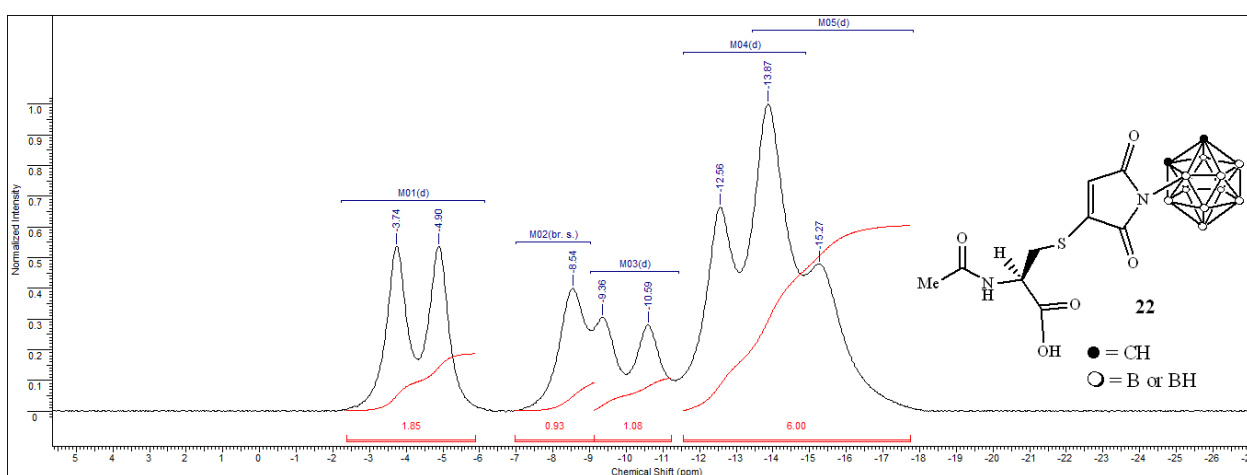

Figure S7. The  $^1\text{H}$  and  $^{11}\text{B}$  NMR spectra of **22** in  $(\text{CD}_3)_2\text{CO}$  at  $25^\circ\text{C}$ .

8. The  $^1\text{H}$  and  $^{11}\text{B}$  NMR spectra of [1-(*o*-carborane-3'-yl)-3-(4,6-dimethylpyrimidin-2-yl)thio]pyrrole-2,5-dione (**23**)

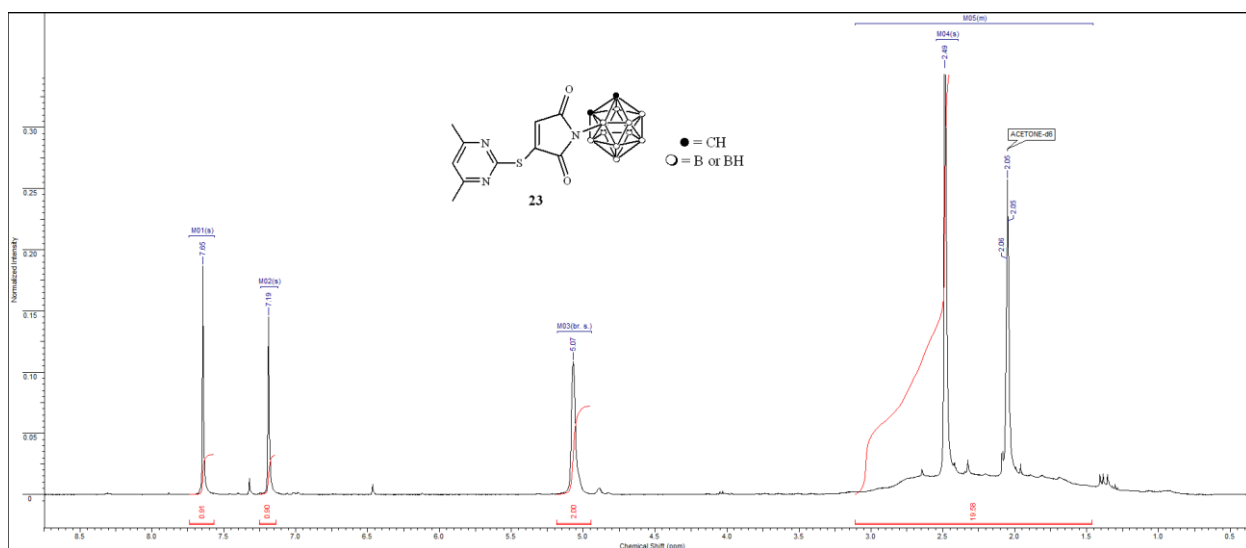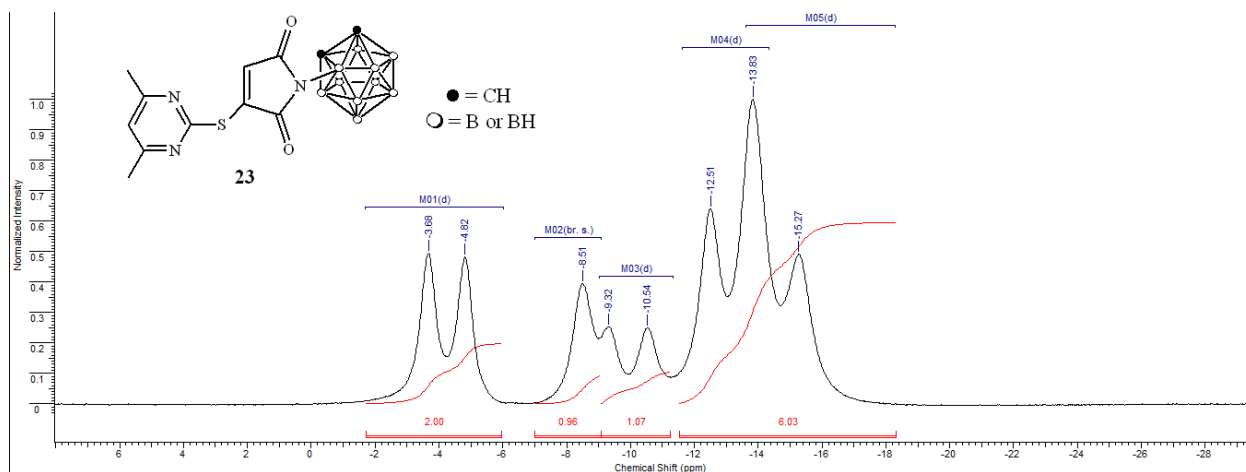

Figure S8. The  $^1\text{H}$  and  $^{11}\text{B}$  NMR spectra of **23** in  $(\text{CD}_3)_2\text{CO}$  at 25  $^\circ\text{C}$ .

9. The  $^1\text{H}$  and  $^{11}\text{B}$  NMR spectra of [6-(*o*-carboran-3'yl)-5,7-dioxo-3-ethoxycarbonyl]perhydropyrrolo[3,4-*b*]thiazine (**24**)

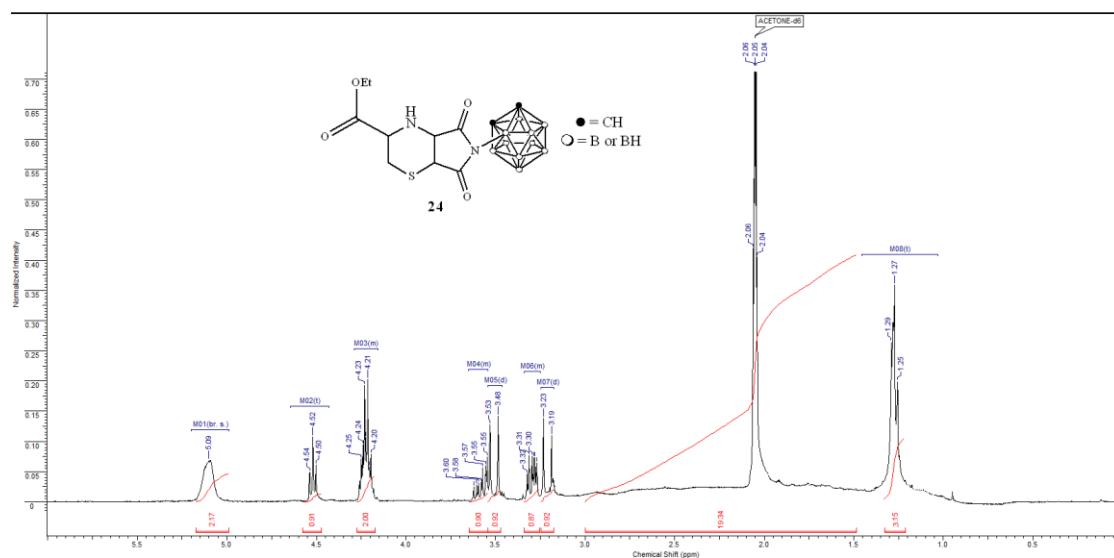



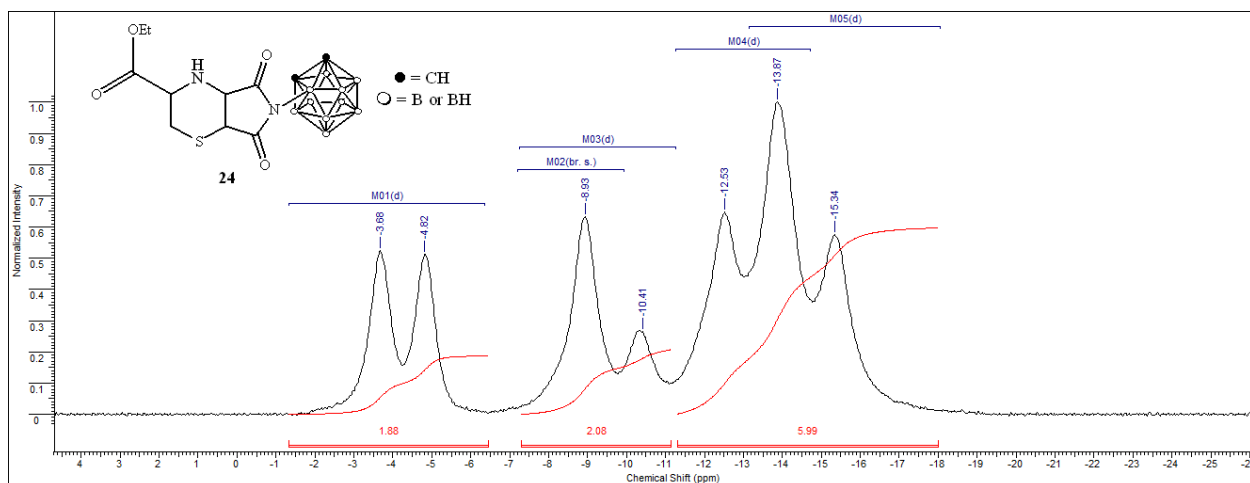

**Figure S9.** The  $^1\text{H}$  and  $^{11}\text{B}$  NMR spectra of **24** in  $(\text{CD}_3)_2\text{CO}$  at  $25^\circ\text{C}$ .

**10. The  $^1\text{H}$  and  $^{11}\text{B}$  NMR spectra of [1-(*o*-carborane-3'-yl)-3-(*m*-carborane-9'-yl)thio]-pyrrole-2,5-dione (**28**)**

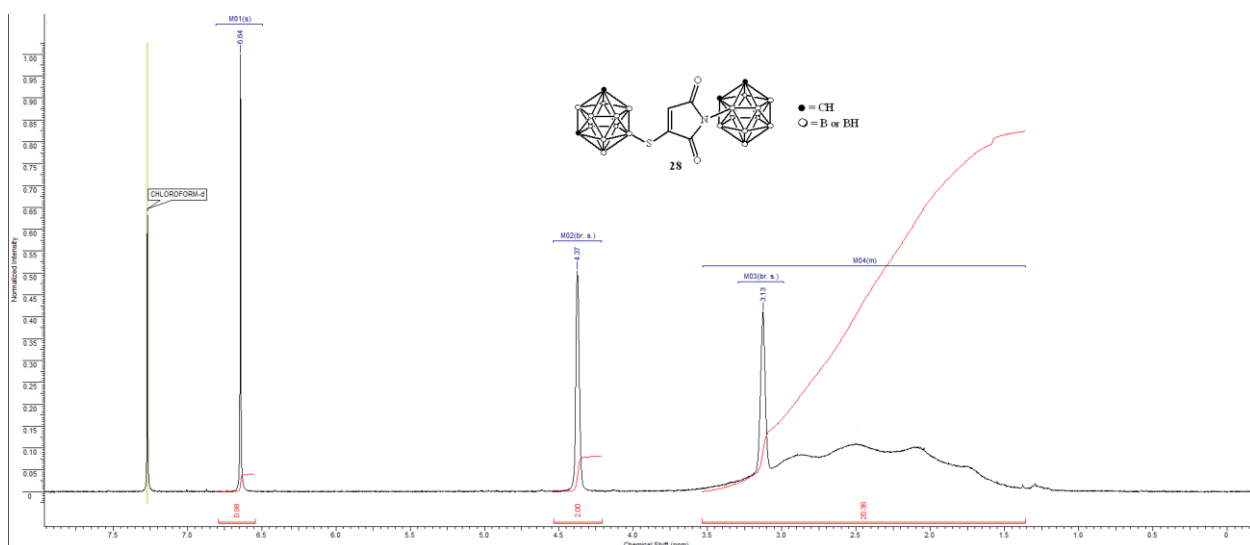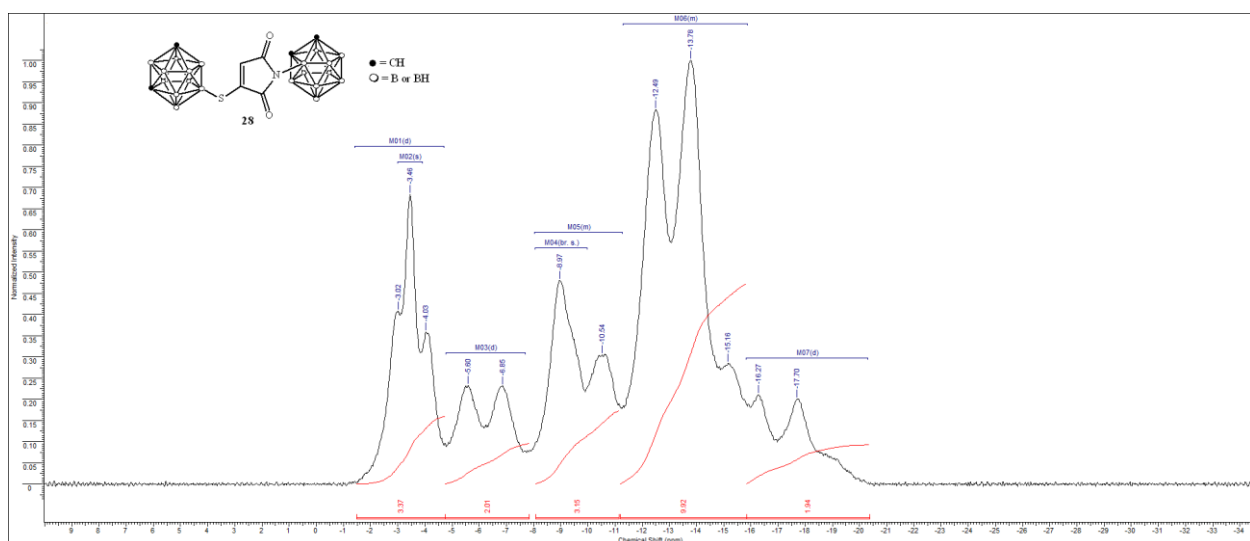

**Figure S10.** The  $^1\text{H}$ ,  $^{11}\text{B}$  NMR spectra of **28** in  $\text{CDCl}_3$  at  $25^\circ\text{C}$ .

**11. The  $^1\text{H}$  and  $^{11}\text{B}$  NMR spectra of [1-(*o*-carborane-3'-yl)-3-(*o*-carborane-9'-yl)thio]-pyrrole-2,5-dione (29)**

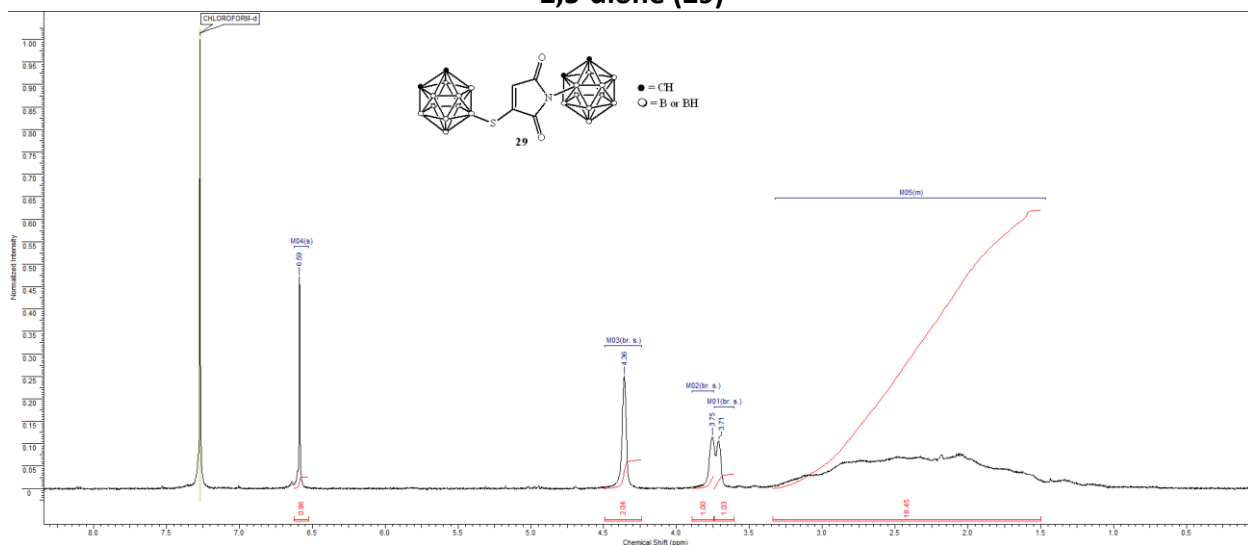

**Figure S11.** The  $^1\text{H}$ ,  $^{11}\text{B}$  NMR spectra of 29 in  $\text{CDCl}_3$  at 25 °C.

**12. The  $^1\text{H}$  and  $^{11}\text{B}$  NMR spectra of [1-(*o*-carborane-3'-yl)-3-(*o*-carborane-1'-yl)thio]-pyrrole-2,5-dione (30)**

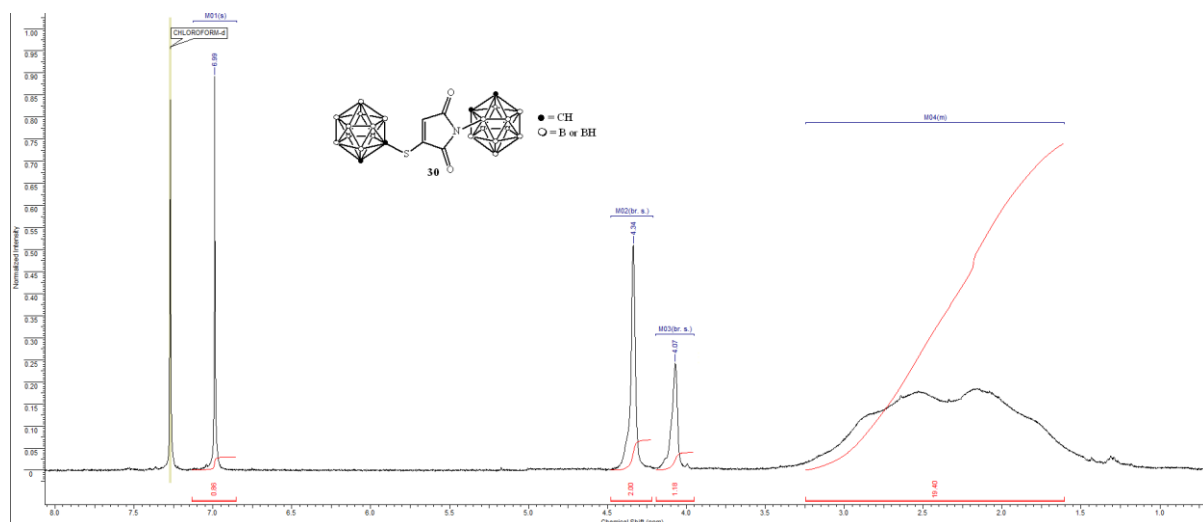

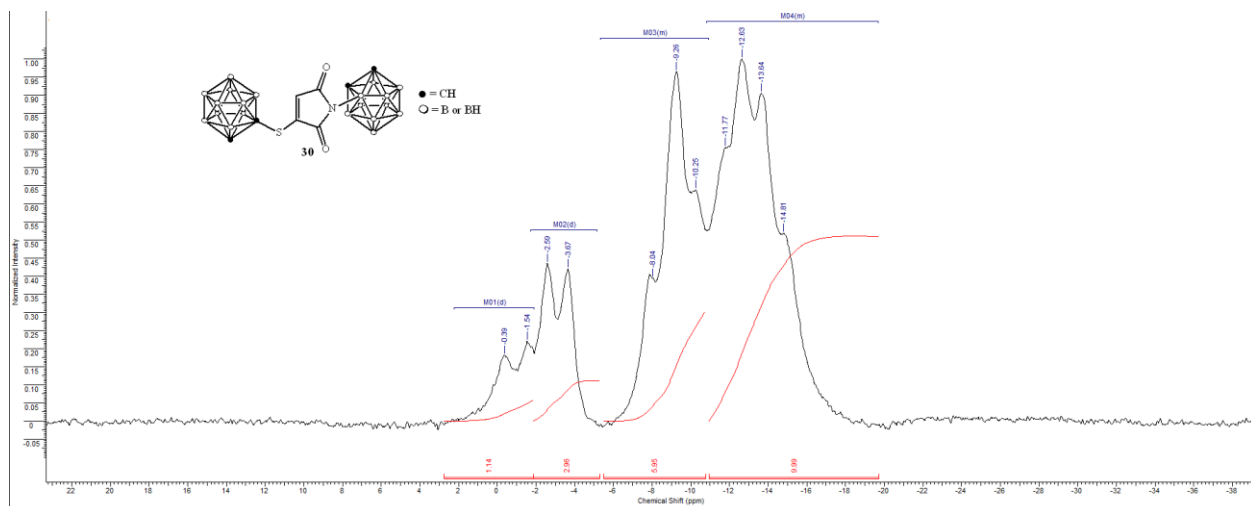

Figure S12. The  $^1\text{H}$ ,  $^{11}\text{B}$  NMR spectra of **30** in  $\text{CDCl}_3$  at  $25^\circ\text{C}$ .

### 13. The $^1\text{H}$ and $^{11}\text{B}$ NMR spectra of [1-(*o*-carboran-3'-yl)-3-S-glutathionyl]-pyrrolidine-2,5-dione (**32**)

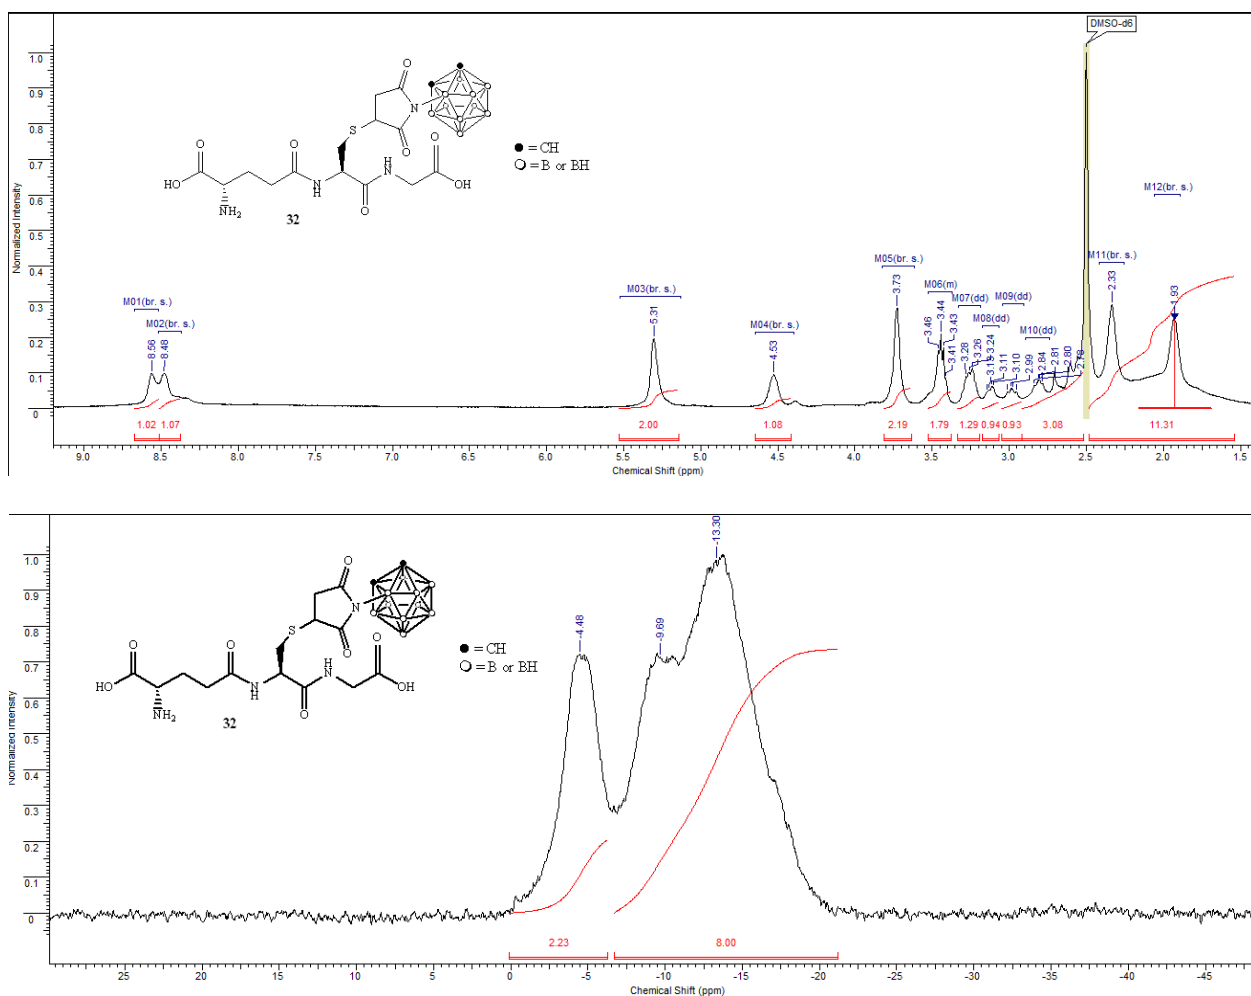

Figure S13. The  $^1\text{H}$  and  $^{11}\text{B}$  NMR spectra of **32** in  $(\text{CD}_3)_2\text{SO}$  at  $25^\circ\text{C}$ .

14. The  $^1\text{H}$ - $^1\text{H}$  COSY spectrum of [1-(*o*-carboran-3'-yl)-3-S-glutathionyl]-pyrrol-2,5-dione (**33**)

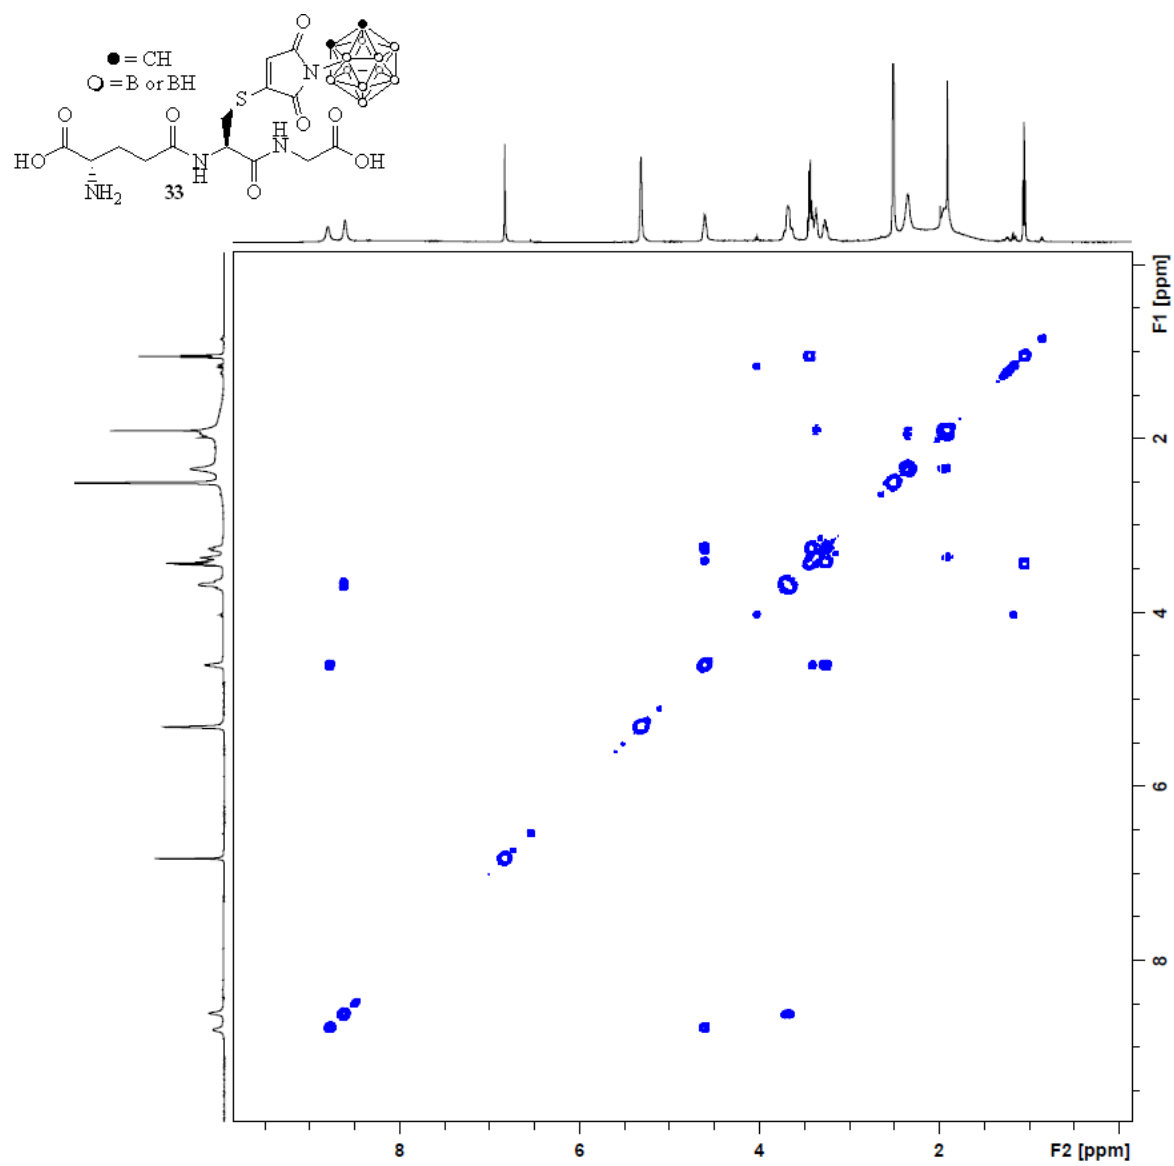

**Figure S14.** The  $^1\text{H}$ - $^1\text{H}$  COSY spectrum of **33** in  $(\text{CD}_3)_2\text{SO}$  at 25 °C.

15. The  $^1\text{H}$  and  $^1\text{H}\{^{11}\text{B}\}$  NMR spectra of [1-(*o*-carboran-3'-yl)-3-S-glutathionyl]-pyrrol-2,5-dione (**33**)

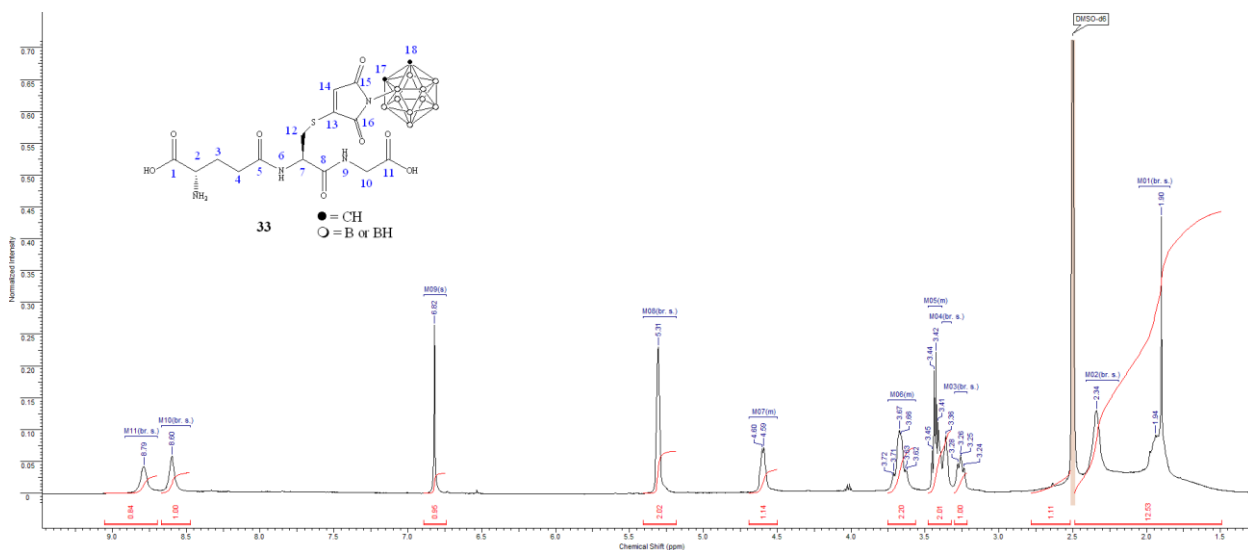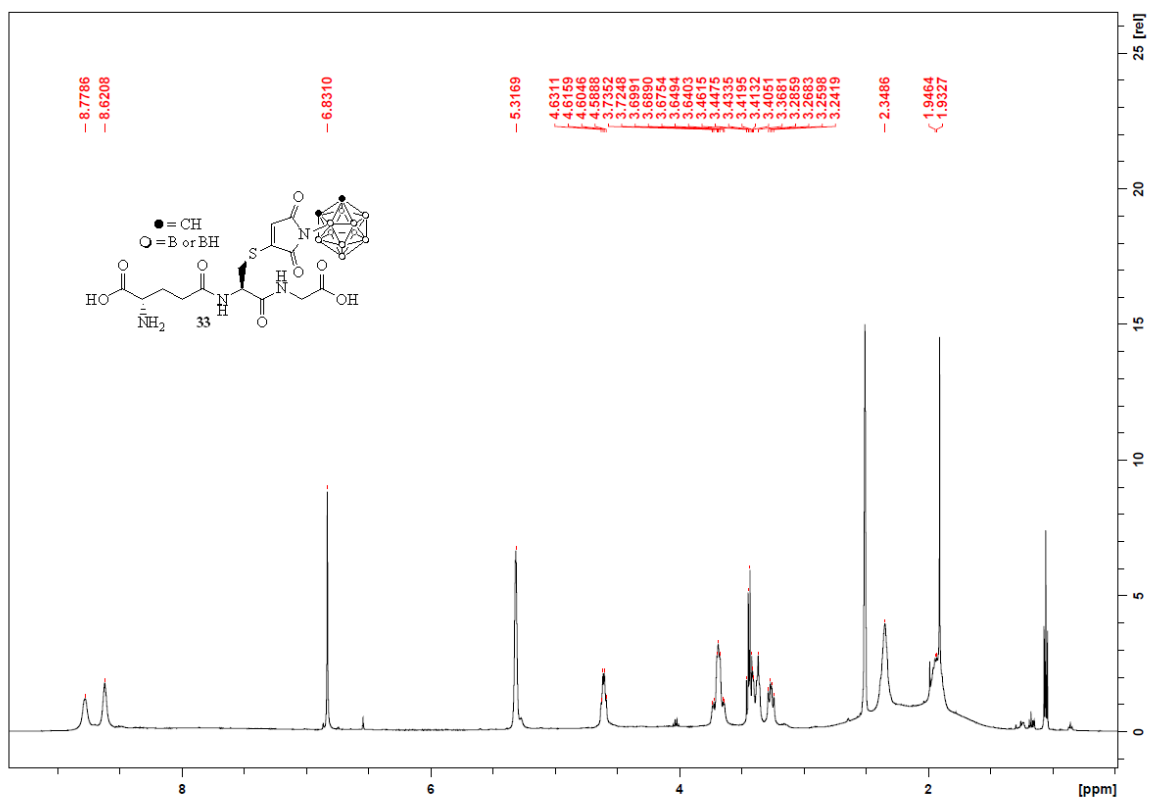

Figure S15. The  $^1\text{H}$  and  $^1\text{H}\{^{11}\text{B}\}$  NMR spectra of **33** in  $(\text{CD}_3)_2\text{SO}$  at 25 °C.

16. The  $^{11}\text{B}$  NMR and  $^{11}\text{B}\{^1\text{H}\}$  NMR spectra of [1-(*o*-carboran-3'-yl)-3-S-glutathionyl]-pyrrol-2,5-dione (**33**)

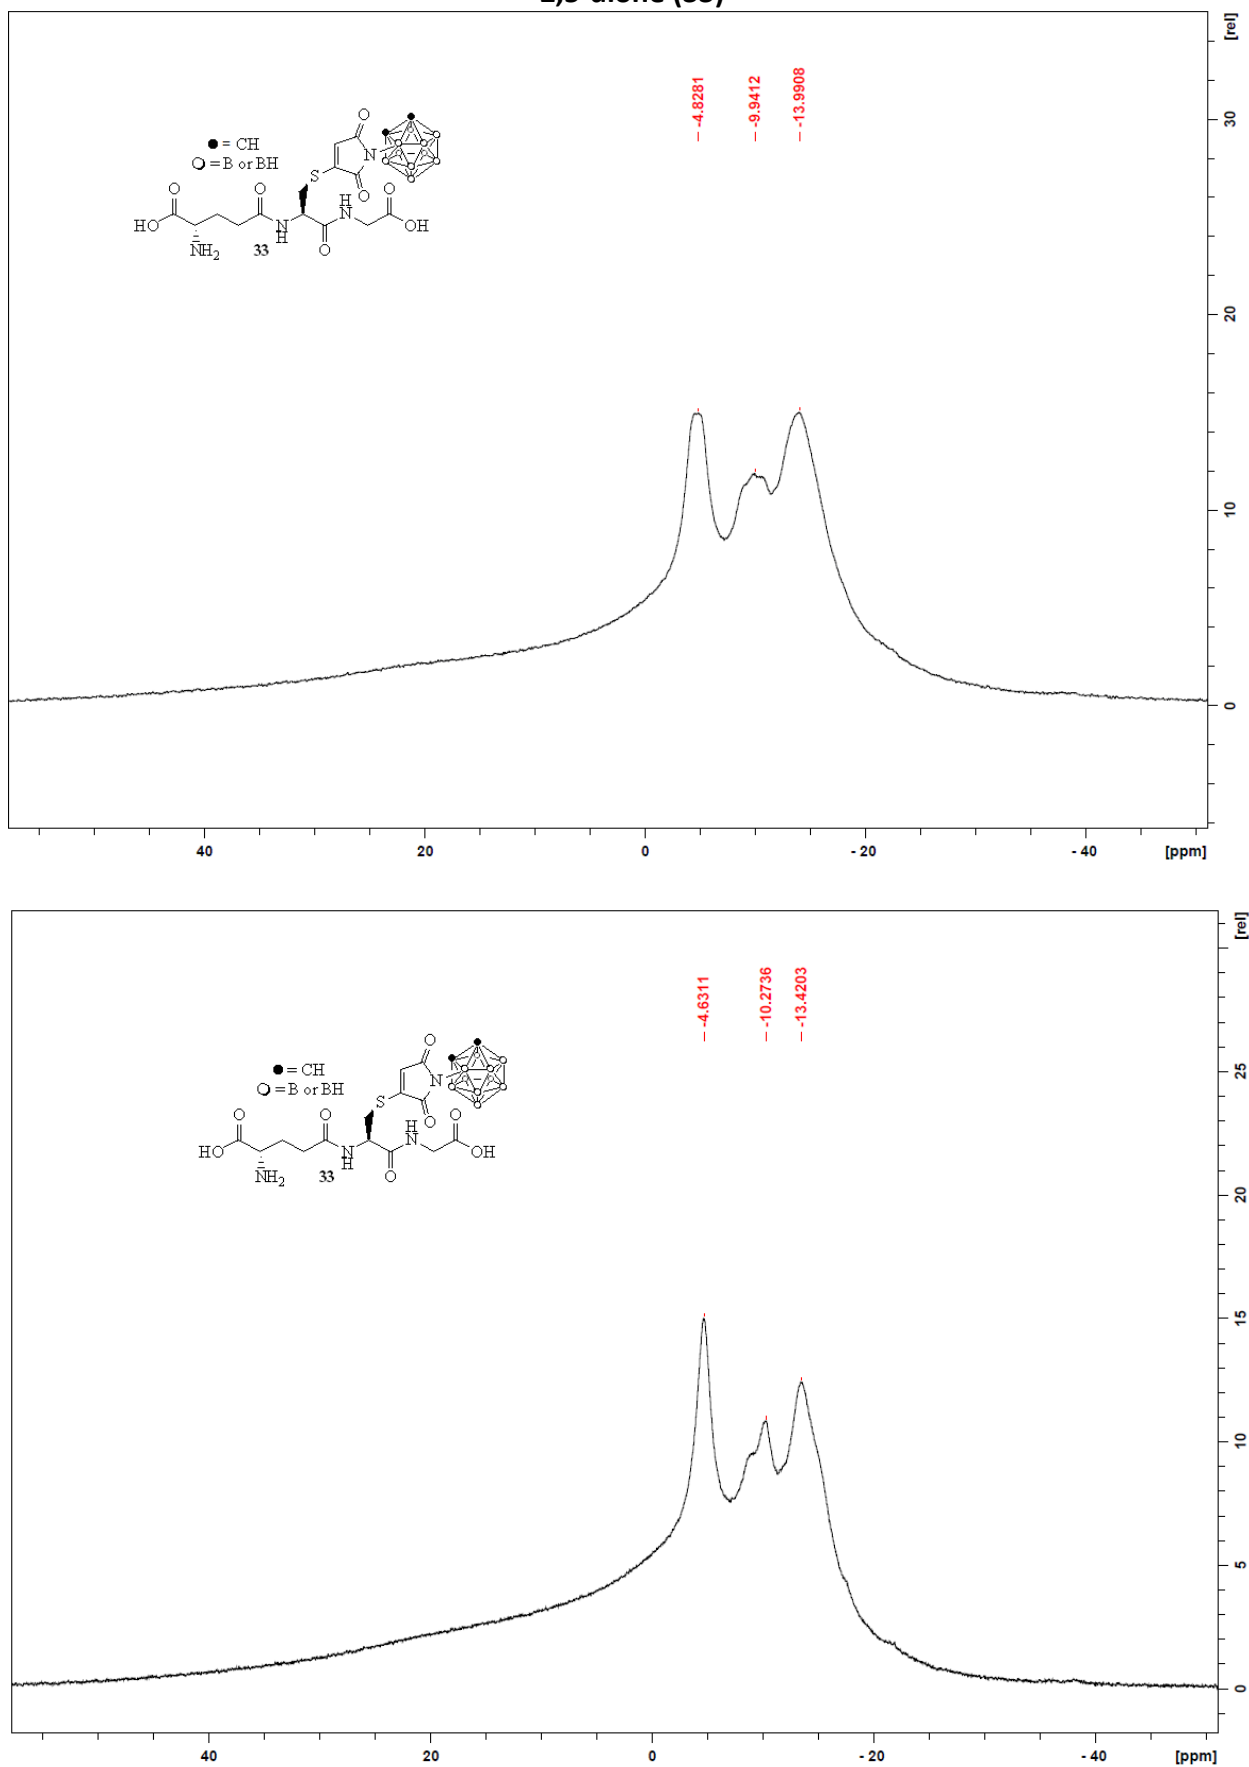

Figure S16. The  $^{11}\text{B}$  NMR and  $^{11}\text{B}\{^1\text{H}\}$  NMR spectra of **33** in  $(\text{CD}_3)_2\text{SO}$  at  $25^\circ\text{C}$ .

17. The  $^{13}\text{C}$  NMR spectrum of [1-(*o*-carboran-3'-yl)-3-S-glutathionyl]-pyrrol-2,5-dione (**33**)

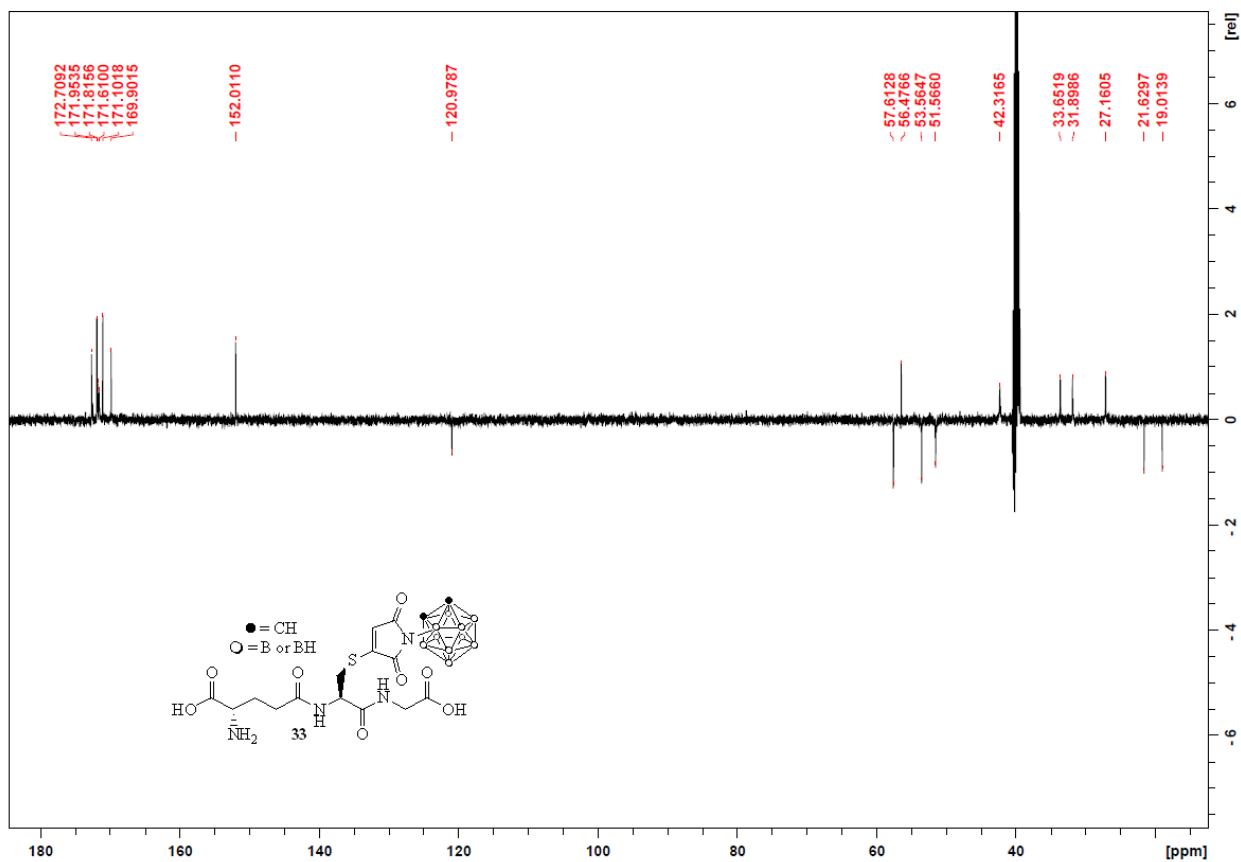

Figure S17. The  $^{13}\text{C}$  NMR spectrum of **33** in  $(\text{CD}_3)_2\text{SO}$  at  $25^\circ\text{C}$ .

18. The  $^1\text{H}$ - $^{13}\text{C}$  HSQC spectrum of [1-(*o*-carboran-3'-yl)-3-S-glutathionyl]-pyrrol-2,5-dione (**33**)

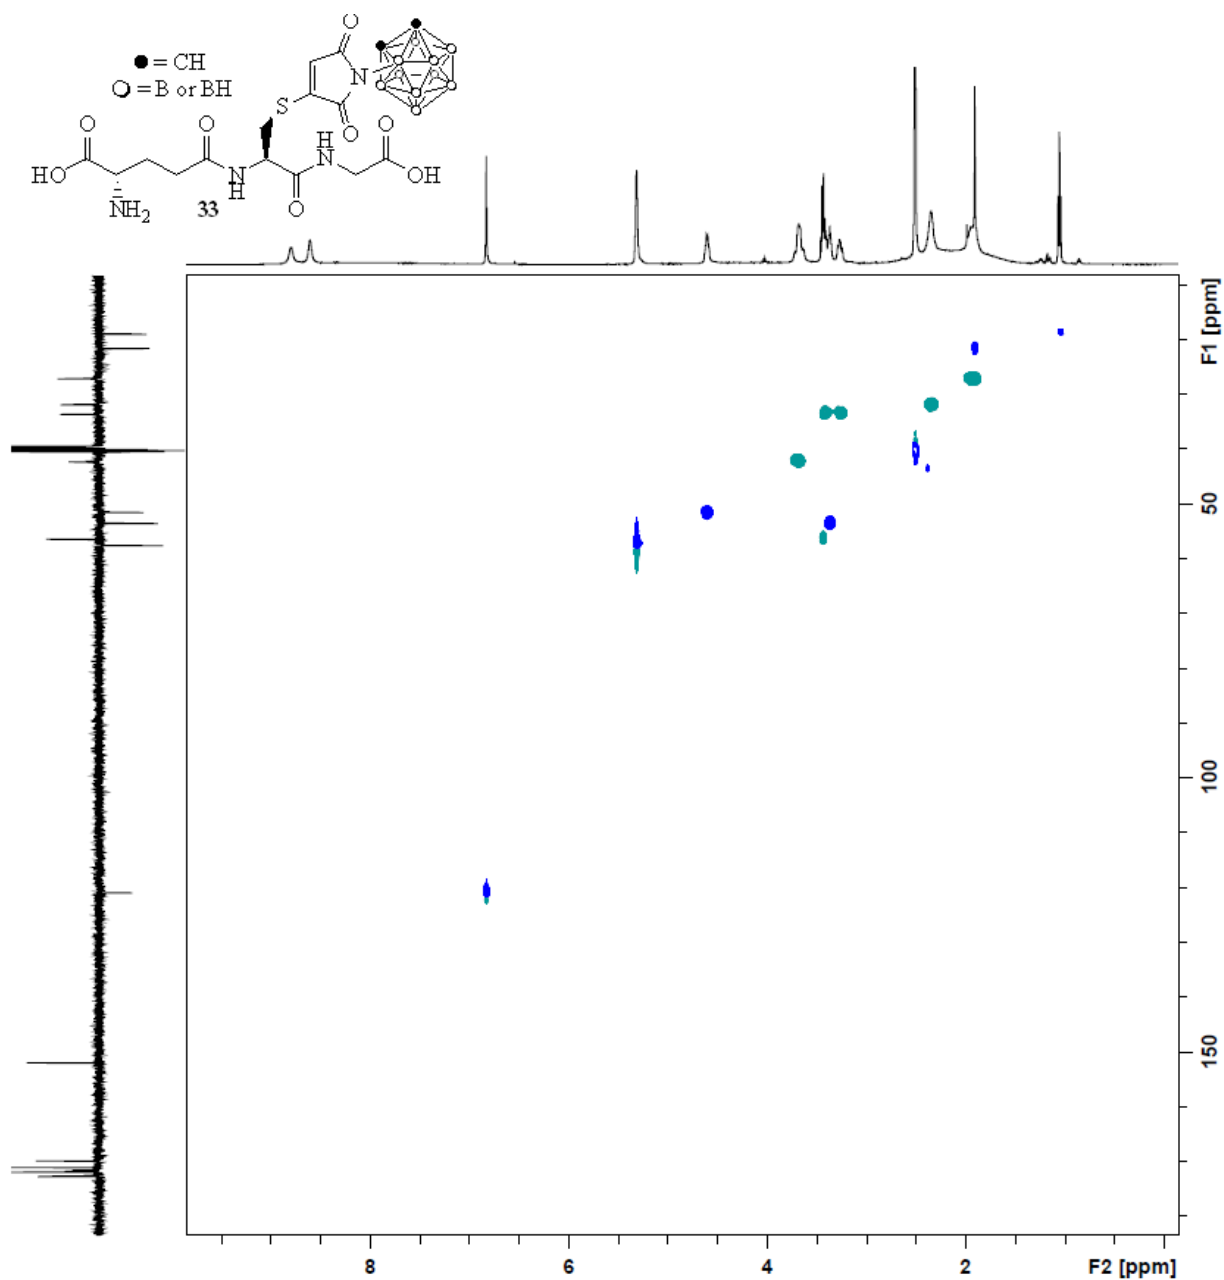

**Figure S18.** The  $^1\text{H}$ - $^{13}\text{C}$  HSQC spectrum of **33** in  $(\text{CD}_3)_2\text{SO}$  at 25 °C.



19. The  $^1\text{H}$ - $^{13}\text{C}$  HMBC spectrum of [1-(*o*-carboran-3'-yl)-3-S-glutathionyl]-pyrrol-2,5-dione (**33**)

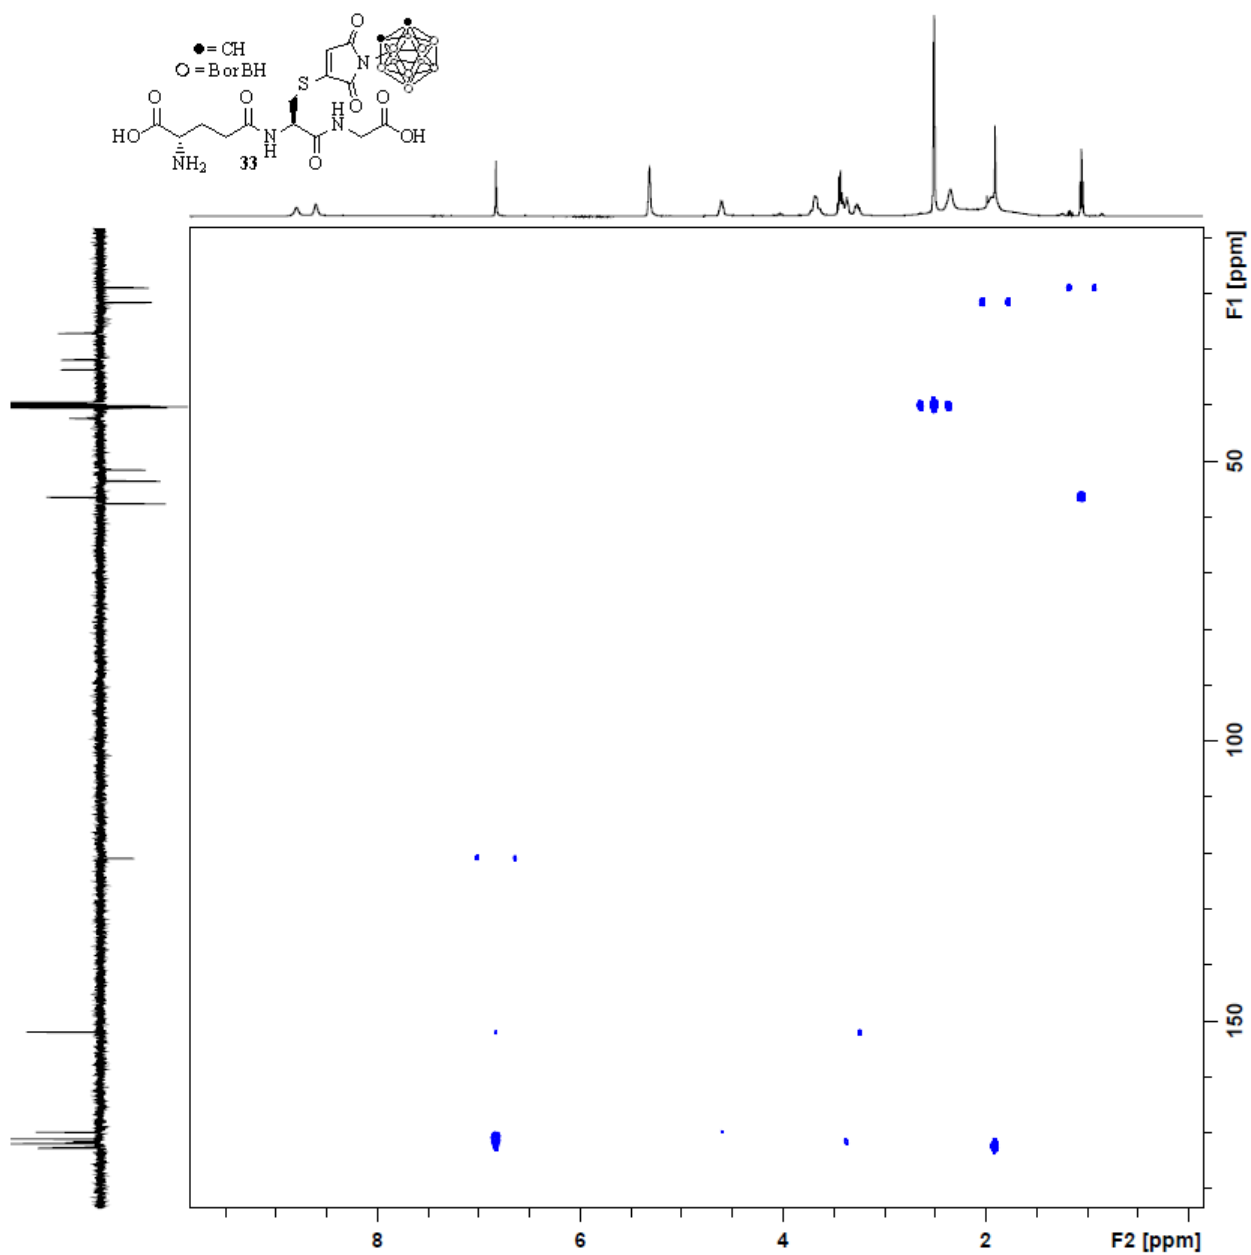

**Figure S19.** The  $^1\text{H}$ - $^{13}\text{C}$  HMBC spectrum of **33** in  $(\text{CD}_3)_2\text{SO}$  at 25 °C.
